# Supplementary material for: Neutrophil Responses to Sterile Implant Materials
Source: PubMed Central journal article supplement (PMC4565661; doi:10.1371/journal.pone.0137550), 2015-09-10
Supplement: pone.0137550.s001.pdf [file pone.0137550.s001.pdf]

## Peritoneal Cavity Cell Counts - effect of shape



**S1 Figure: Effect of implant shape on neutrophil numbers.** Neutrophil presence in response to alginate implants that were spheres (same as data presented in Fig. 2), threads, cylinders or irregular-shaped was determined. Data are based on at least 1 independent experiment with  $n \geq 3$  mice
