# Supplementary material for: Neutrophil Responses to Sterile Implant Materials
Source: PubMed Central journal article supplement (PMC4565661; doi:10.1371/journal.pone.0137550), 2015-09-10
Supplement: pone.0137550.s002.pdf [file pone.0137550.s002.pdf]

## Weight Change as a Measure of Animal Health

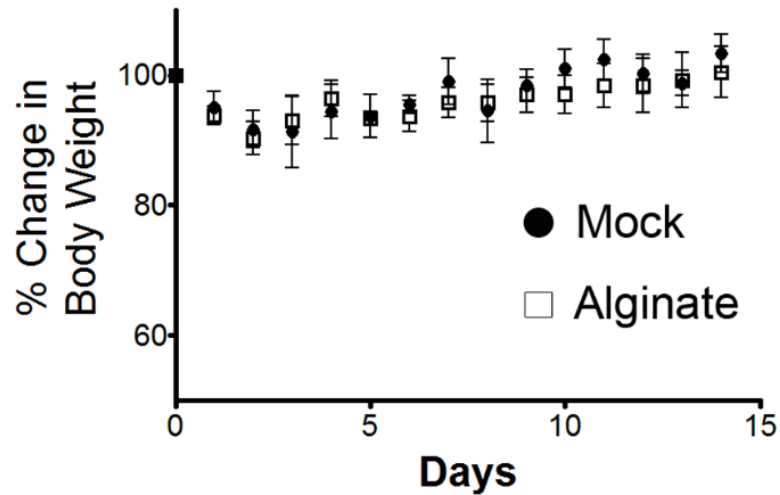

**S2 Figure: Weight changes in mice.** No significant changes were observed in the weight of mice that were mock treated or implanted with alginate microcapsules. An expected drop in weight was observed following surgery (in both mock and microcapsule implanted), but the weights quickly recovered and by 2 weeks following surgery the mice had started to gain weight.
