# Supplementary material for: Neutrophil Responses to Sterile Implant Materials
Source: PubMed Central journal article supplement (PMC4565661; doi:10.1371/journal.pone.0137550), 2015-09-10
Supplement: pone.0137550.s003.pdf [file pone.0137550.s003.pdf]

## Scanning Electron Micrographs

Polystyrene

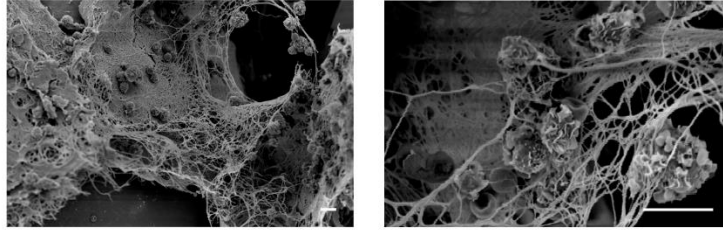

PMMA

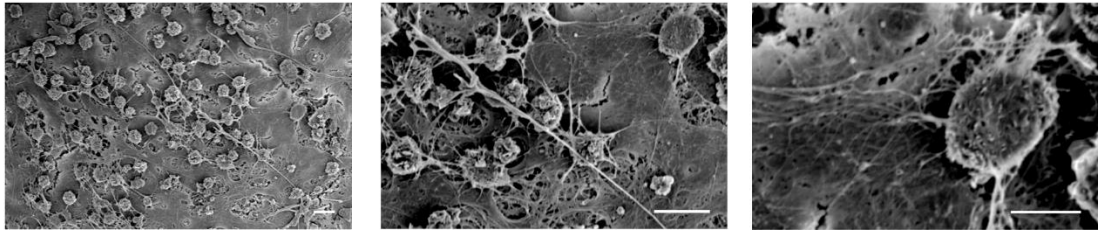

**S3 Figure: Neutrophil extracellular traps (SEM).** Scanning electron micrographs of polystyrene and PMMA microcapsules retrieved 3 days following implantation in male C57BL/6J mice. Long, thin fibers are observed on the surface of the microcapsules that could potentially be part of neutrophil extracellular traps. Scale bars on images are 5  $\mu\text{m}$ , except for PMMA extreme right (1  $\mu\text{m}$ ) image. Images are representative of 2 independent experiments with  $n \geq 5$ .
