# Supplementary material for: Neutrophil Responses to Sterile Implant Materials
Source: PubMed Central journal article supplement (PMC4565661; doi:10.1371/journal.pone.0137550), 2015-09-10
Supplement: pone.0137550.s004.pdf [file pone.0137550.s004.pdf]

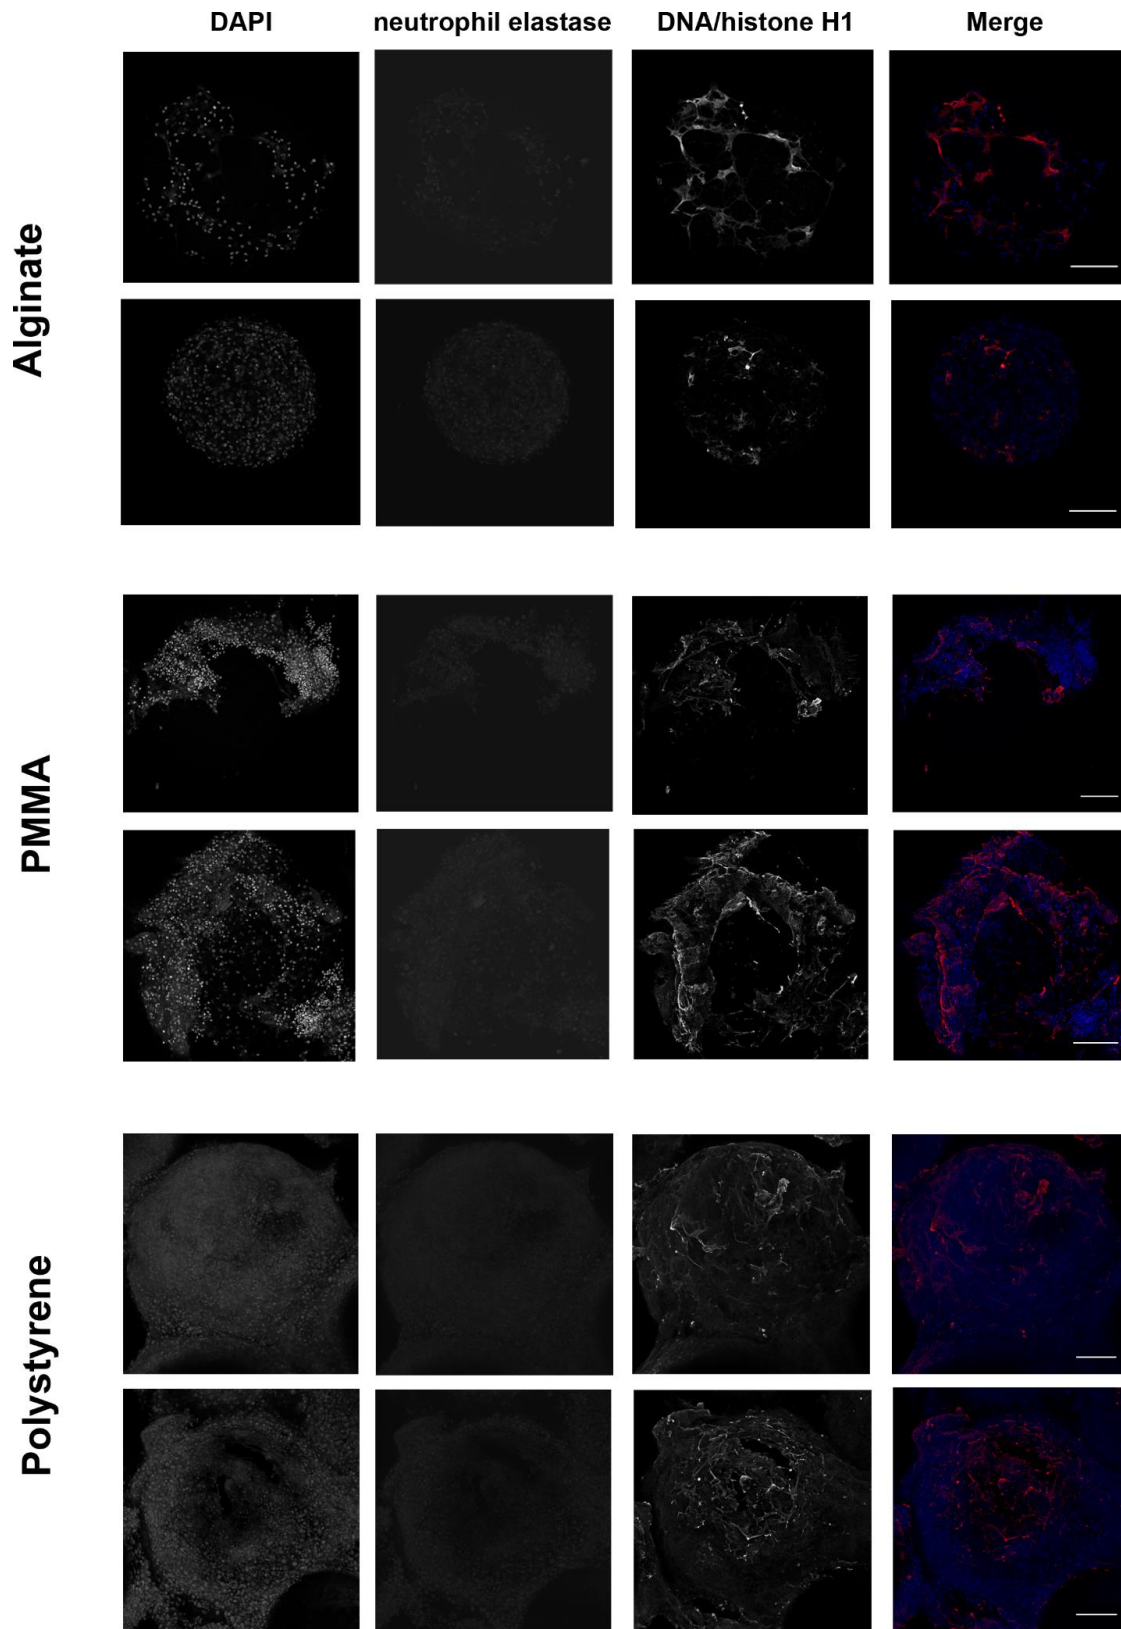

**S4 Figure: Addendum to figure 5 in manuscript.** Additional images of data presented in figure 5. See legend of figure 5 for details.
