# Supplementary material for: Neutrophil Responses to Sterile Implant Materials
Source: PLoS One. 2015 Sep 10;10(9):e0137550. doi: 10.1371/journal.pone.0137550 (PMC4565661; doi:10.1371/journal.pone.0137550)
Supplement: S1 Table — Endotoxin testing, culture of peritoneal fluid and general health of animals implanted with microcapsules suggested an absence of microbial contaminants or infections. (PDF) [file pone.0137550.s006.pdf]

| Material                                                                          | Testing Method                                                                                                                      | Results                                                                                                                                             |
|-----------------------------------------------------------------------------------|-------------------------------------------------------------------------------------------------------------------------------------|-----------------------------------------------------------------------------------------------------------------------------------------------------|
| Alginate Solution                                                                 | Sold endotoxin free (below detectable limits) by manufacturer. Manufacturer's testing method unknown                                | -                                                                                                                                                   |
| Alginate microcapsules (prepared in our laboratory)                               | Limulus Amebocyte Lysate assay for endotoxins<br><br>Done in our laboratory<br>And Commercial testing at Charles River Laboratories | Below Detection Limits ( < 0.05 EU / ml)                                                                                                            |
| Saline (used to suspend microcapsules prior to implantation in mice)              | Limulus Amebocyte Lysate assay for endotoxins<br><br>Done in our laboratory and Commercial testing at Charles River Laboratories    | Below Detection Limits ( < 0.05 EU / ml)                                                                                                            |
| Glass microcapsules (purchased from commercial vendor)                            | Limulus Amebocyte Lysate assay for endotoxins<br><br>Commercial testing at Charles River Laboratories                               | Below Detection Limits ( < 0.05 EU / ml)                                                                                                            |
| Peritoneal Exudate (isolated from mice implanted with alginate microcapsules)     | Limulus Amebocyte Lysate assay for endotoxins<br><br>Done in our laboratory                                                         | Below Detection Limits ( < 0.05 EU / ml)                                                                                                            |
| Peritoneal Cavity Fluid (swabbed from mice implanted with alginate microcapsules) | Swab culture by MIT division of comparative medicine core facility                                                                  | No growth at 48 hours                                                                                                                               |
| Animals                                                                           | Animal Health monitoring by MIT veterinary staff and regular weighing of mice                                                       | No weight loss at 2 weeks post implantation (supplementary fig. 4). Animals appear healthy according to MIT veterinary staff and MIT CAC guidelines |

**Supplementary Table 1: Absence of microbial contaminants and infections in the peritoneal cavity.** Endotoxin testing, culture of peritoneal fluid and general health of animals implanted with microcapsules suggested an absence of microbial contaminants or infections.
